# Supplementary material
Source: Springer Nature journal article supplement (https://www.springermedizin.de/resource/supplementary/12876_2009_443_MOESM4_ESM.pdf/9437022)

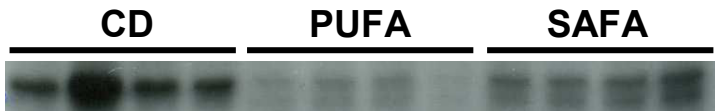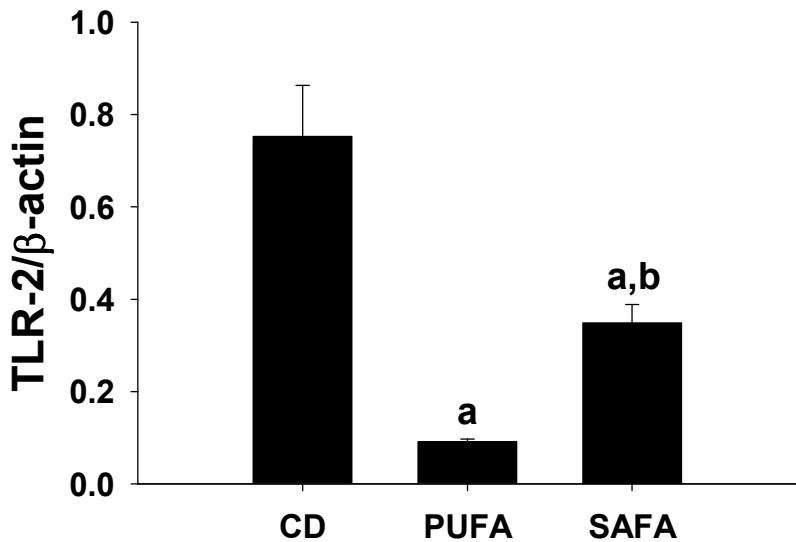

Supplement: MOESM4 [file 9437022]
